# Supplementary material for: Prediction of Type 2 Diabetes Using Alternate Anthropometric Measures in a Multi-Ethnic Cohort
Source: Oxford University Press journal article supplement (doi:10.2337/dc08-1663), 2009-02-05
Supplement: dc08-1663_online_appendix.doc [file dc08-1663_online_appendix.doc]

**Table A. Association of baseline log-transformed anthropometric measures with incident type 2 diabetes mellitus in the Insulin Resistance Atherosclerosis Study, 1992-1994**

| Full Cohort | | | Non-Hispanic White | | | African American | | | Hispanic | | |
| --- | --- | --- | --- | --- | --- | --- | --- | --- | --- | --- | --- |
|  | OR (95% CI) | AROC |  | OR (95% CI) | AROC |  | OR (95% CI) | AROC |  | OR (95% CI) | AROC |
| WHtR | 1.71(1.41 – 2.08) | 0.698 | BMI | 2.09(1.52 – 2.86) | 0.743 | WHR | 2.28(1.41 – 3.71) | 0.742 | BMI | 1.64(1.21 – 2.22) | 0.683 |
| BMI | 1.68(1.39 – 2.02) | 0.695 | STratio | 2.25(1.47 – 3.47) | 0.741 | STratio | 2.48(1.46 – 4.20) | 0.737 | WC | 1.62(1.16 – 2.26) | 0.681 |
| WC | 1.66(1.36 – 2.02) | 0.691 | % BF | 3.16(1.88 – 5.32) | 0.738 | WC | 1.35(0.95 – 1.91) | 0.713 | WHtR | 1.58(1.15 – 2.17) | 0.680 |
| %BF | 2.15(1.60 – 2.91) | 0.681 | WHtR | 2.11(1.52 – 2.95) | 0.737 | WHtR | 1.46(1.03 – 2.06) | 0.710 | %BF | 2.10(1.30 – 3.40) | 0.671 |
| STratio | 1.75(1.40 – 2.24) | 0.677 | WC | 2.08(1.46 – 2.96) | 0.725 | BMI | 1.31(0.92 – 1.85) | 0.700 | SumSF | 1.77(1.22 – 2.57) | 0.669 |
| WHR | 1.83(1.41 – 2.38) | 0.679 | HC | 1.63(1.21 – 2.18) | 0.699* | SumSF | 1.18(0.78 – 1.79) | 0.696 | HC | 1.47(1.09 – 1.98) | 0.664 |
| SumSF | 1.57(1.26 – 1.96) | 0.666* | WHR | 2.00(1.26 – 3.18) | 0.698 | HC | 0.98(0.66 – 1.36) | 0.694 | WHR | 1.37(0.88 – 2.13) | 0.626 |
| HC | 1.35(1.13 – 1.61) | 0.659* | SumSF | 1.87(1.29 – 2.72) | 0.693* | %BF | 1.26(0.73 – 2.17) | 0.692 | STratio | 1.11(0.74 – 1.67) | 0.608* |

Model B - Adjusted for variables in model A, as well as family history of diabetes and systolic blood pressure. Odds Ratios (ORs) are estimated by logistic regression and refer to one standard deviation (SD) change in the natural log of the variable. Each row is an individual model with adjustments as indicated. *AROC p < 0.05 compared to table’s most predictive model.
